# Supplementary material for: Influence of Interactions between Nitrogen, Phosphorus Supply and Epichloё bromicola on Growth of Wild Barley (Hordeum brevisubulatum)
Source: MDPI journal article supplement (doi:10.3390/jof7080615), 2021-07-29
Supplement: s1 [file s1]

**Figure S1.** Contents of Na<sup>+</sup> and K<sup>+</sup> of *Hordeum brevisubulatum* under different concentrations of N and P. **(a)** Content of Na<sup>+</sup>, **(b)** Content of K<sup>+</sup>. E+: *Epichloë bromicola*-infected plants, E-: *E. bromicola*-free plants. Different lowercase letters and majuscule letters on top of bars indicate significant differences ( $P < 0.05$ ) of E- and E+ plants between the different N concentrations, respectively. An \* on the top of the bars, means a significant difference at  $P < 0.05$  (independent *t*-test) between E+ and E- plants under the same nutrient concentration.
