# Supplementary material for: Influence of Interactions between Nitrogen, Phosphorus Supply and Epichloё bromicola on Growth of Wild Barley (Hordeum brevisubulatum)
Source: MDPI journal article supplement (doi:10.3390/jof7080615), 2021-07-29
Supplement: s1 [file s1]

**Table S1.** Three-way ANOVA for the effects of endophyte (E), nitrogen concentration (N) and phosphorus concentration (P) on germination rate (%), germination potential (%), germination index and radicle length of *Hordeum brevisubulatum*. N×P: interaction of N and P, N×E: interaction of N and *Epichloë bromicola* ; P×E: interaction of P and *E. bromicola*; N×P×E: interaction of N, P and *E. bromicola*.

| Treatments | dF | Germination rate |       | Germination potential |        | Germination index |        | Radicle length |        |
|------------|----|------------------|-------|-----------------------|--------|-------------------|--------|----------------|--------|
|            |    | F                | P     | F                     | P      | F                 | P      | F              | P      |
| N          | 2  | 5.766            | 0.007 | 35.081                | <0.001 | 47.708            | <0.001 | 77.757         | <0.001 |
| P          | 2  | 1.255            | 0.297 | 0.864                 | 0.430  | 0.043             | 0.958  | 0.039*         | 0.962  |
| E          | 1  | 3.457            | 0.071 | 16.329                | <0.001 | 20.245            | <0.001 | 10.085         | 0.002  |
| N×P        | 4  | 1.800            | 0.150 | 1.118                 | 0.363  | 2.404             | 0.068  | 35.07          | <0.001 |
| N×E        | 2  | 2.313            | 0.113 | 5.771                 | 0.007  | 4.084             | 0.025  | 14.281         | <0.001 |
| P×E        | 2  | 1.644            | 0.207 | 3.688                 | 0.035  | 2.971             | 0.064  | 6.056          | 0.002  |
| N×P×E      | 4  | 2.103            | 0.101 | 2.372                 | 0.071  | 1.447             | 0.239  | 5.957          | <0.001 |
