# Supplementary material for: Influence of Interactions between Nitrogen, Phosphorus Supply and Epichloё bromicola on Growth of Wild Barley (Hordeum brevisubulatum)
Source: MDPI journal article supplement (doi:10.3390/jof7080615), 2021-07-29
Supplement: s1 [file s1]

**Table S3.**Three-way ANOVA for the effects of nitrogen concentration (N), phosphorus concentration (P) and endophyte (E) on a chlorophyll content and root metabolic activity of *Hordeum brevisubulatum*. N×P: interaction of N and P, N×E: interaction of N and *Epichloë bromicola*; P×E: interaction of P and *E. bromicola*; N×P×E: interaction of N, P and *E. bromicola*.

| Treatments | dF | Chlorophyll content |        | Root metabolic activity |        |
|------------|----|---------------------|--------|-------------------------|--------|
|            |    | F                   | P      | F                       | P      |
| N          | 2  | 34.256              | <0.001 | 6.579                   | 0.004  |
| P          | 2  | 5.355               | 0.009  | 46.398                  | <0.001 |
| E          | 1  | 32.346              | <0.001 | 18.774                  | <0.001 |
| N×P        | 4  | 7.314               | <0.001 | 25.352                  | <0.001 |
| N×E        | 2  | 2.042               | 0.145  | 2.319                   | 0.113  |
| P×E        | 2  | 2.49                | 0.097  | 14.638                  | <0.001 |
| N×P×E      | 4  | 2.628               | 0.051  | 3.859                   | 0.010  |
