# Supplementary material for: Influence of Interactions between Nitrogen, Phosphorus Supply and Epichloё bromicola on Growth of Wild Barley (Hordeum brevisubulatum)
Source: MDPI journal article supplement (doi:10.3390/jof7080615), 2021-07-29
Supplement: s1 [file s1]

**Table S4.** Three-way ANOVA for the effects of nitrogen concentration (N), phosphorus concentration (P) and endophyte (E) on Na<sup>+</sup> and K<sup>+</sup> contents in leaves and roots of *Hordeum brevisubulatum*. N×P: interaction of N and P, N×E: interaction of N and *Epichloë bromicola* ; P×E: interaction of P and *E. bromicola*; N×P×E: interaction of N, P and *E. bromicola*.

|             | Treatments | dF | Na <sup>+</sup> content |        | K <sup>+</sup> content |        |
|-------------|------------|----|-------------------------|--------|------------------------|--------|
|             |            |    | F                       | P      | F                      | P      |
| Aboveground | N          | 2  | 2.327                   | 0.112  | 94.271                 | <0.001 |
|             | P          | 2  | 49.234                  | <0.001 | 41.616                 | <0.001 |
|             | E          | 1  | 1.765                   | 0.192  | 0.028                  | 0.868  |
|             | N×P        | 4  | 3.976                   | 0.009  | 13.793                 | <0.001 |
|             | N×E        | 2  | 5.575                   | 0.008  | 23.738                 | <0.001 |
|             | P×E        | 2  | 6.592                   | 0.004  | 18.902                 | <0.001 |
|             | N×P×E      | 4  | 3.049                   | 0.029  | 2.089                  | 0.105  |
| Underground | N          | 2  | 123.497                 | <0.001 | 61.109                 | <0.001 |
|             | P          | 2  | 111.835                 | <0.001 | 136.893                | <0.001 |
|             | E          | 1  | 5.373                   | 0.027* | 14.872                 | <0.001 |
|             | N×P        | 4  | 39.533                  | <0.001 | 15.442                 | <0.001 |
|             | N×E        | 2  | 17.62                   | <0.001 | 4.248                  | 0.023  |
|             | P×E        | 2  | 10.926                  | <0.001 | 2.925                  | 0.068  |
|             | N×P×E      | 4  | 6.854                   | <0.001 | 4.234                  | 0.007  |
