# Supplementary material for: Influence of Interactions between Nitrogen, Phosphorus Supply and Epichloё bromicola on Growth of Wild Barley (Hordeum brevisubulatum)
Source: MDPI journal article supplement (doi:10.3390/jof7080615), 2021-07-29
Supplement: s1 [file s1]

**Table S2.** Three-way ANOVA for the effects of nitrogen concentration (N), phosphorus concentration (P) and endophyte (E) on aboveground biomass, underground biomass, plant height and number of tillers of *Hordeum brevisubulatum*. N×P: interaction of N and P, N×E: interaction of N and *Epichloë bromicola*; P×E: interaction of P and *E. bromicola*; N×P×E: interaction of N, P and *E. bromicola*.

| Treatments | dF | Aboveground biomass |        | Underground biomass |        | Plant height |        | Number of tillers |        |
|------------|----|---------------------|--------|---------------------|--------|--------------|--------|-------------------|--------|
|            |    | F                   | P      | F                   | P      | F            | P      | F                 | P      |
| N          | 2  | 57.684              | <0.001 | 9.919               | <0.001 | 173.007      | <0.001 | 72.580            | <0.001 |
| P          | 2  | 66.365              | <0.001 | 51.919              | <0.001 | 150.507      | <0.001 | 54.612            | <0.001 |
| E          | 1  | 0.298               | 0.587  | 1.124               | 0.293  | 5.670        | 0.021  | 2.621             | 0.107  |
| N×P        | 4  | 20.093              | <0.001 | 7.017               | <0.001 | 22.952       | <0.001 | 12.188            | <0.001 |
| N×E        | 2  | 1.585               | 0.212  | 0.769               | 0.467  | 2.007        | 0.144  | 1.018             | 0.363  |
| P×E        | 2  | 0.671               | 0.515  | 2.095               | 0.130  | 1.017        | 0.368  | 2.031             | 0.133  |
| N×P×E      | 4  | 0.423               | 0.792  | 6.558               | <0.001 | 2.089        | 0.095  | 0.451             | 0.772  |
