# Supplementary material for: Influence of Interactions between Nitrogen, Phosphorus Supply and Epichloё bromicola on Growth of Wild Barley (Hordeum brevisubulatum)
Source: J Fungi (Basel). 2021 Jul 29;7(8):615. doi: 10.3390/jof7080615 (PMC8397062; doi:10.3390/jof7080615)
Supplement: Supplementary file 1 [file jof-07-00615-s001.zip]

Archive with 6 entries (6 files):
- Description of Figure S1.pdf
- Figure S1.jpg
- Table S1.pdf
- Table S2.pdf
- Table S3.pdf
- Table S4.pdf
